# Supplementary material for: Ubiquitination by SAG regulates macrophage survival/death and immune response during infection
Source: PubMed Central journal article supplement — Cell Death Differ. 2014 May 2;21(9):1388–98. doi: 10.1038/cdd.2014.54 (PMC4131172; doi:10.1038/cdd.2014.54), 2014-05-02

## Supplementary Figures

**Figure S1. Bacterial LPS induces early expression of SAG mRNA and protein in J774 cells.**

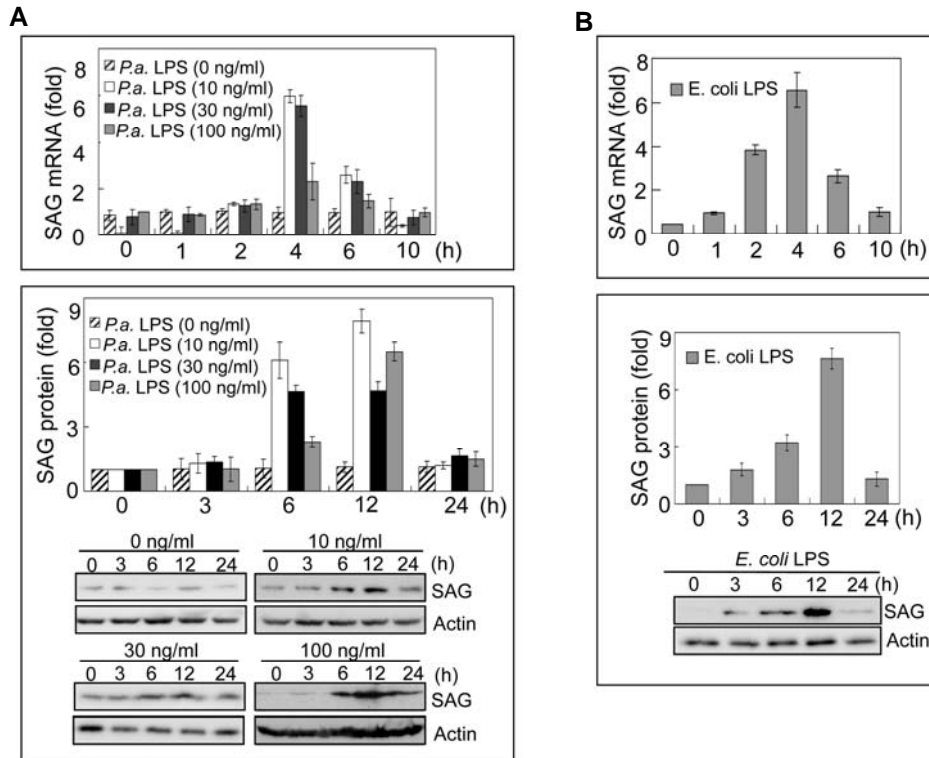

**Figure S2. SAG-knockdown in J774, RAW and BMDM cells.**

**A. J774 cells**

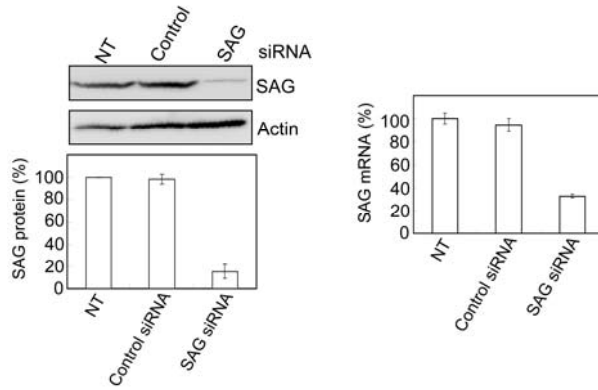

**B. RAW cells**

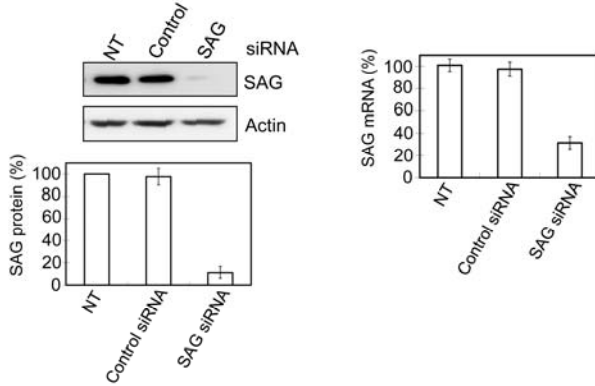

**C. BMDM cells**

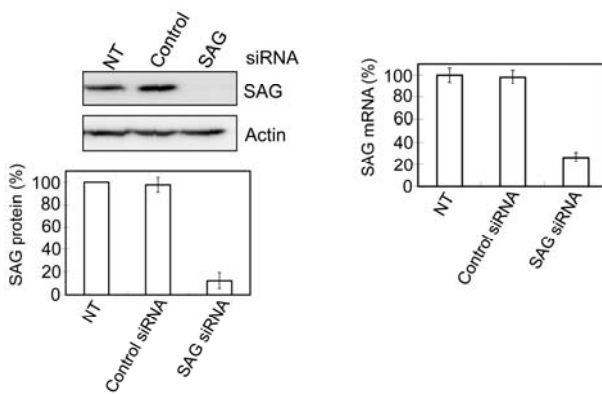

Figure S3. FACS analysis of apoptosis after PAMP-treatments of J774 cells with and without SAG-knockdown.

A. FACS histograms of apoptosis assay

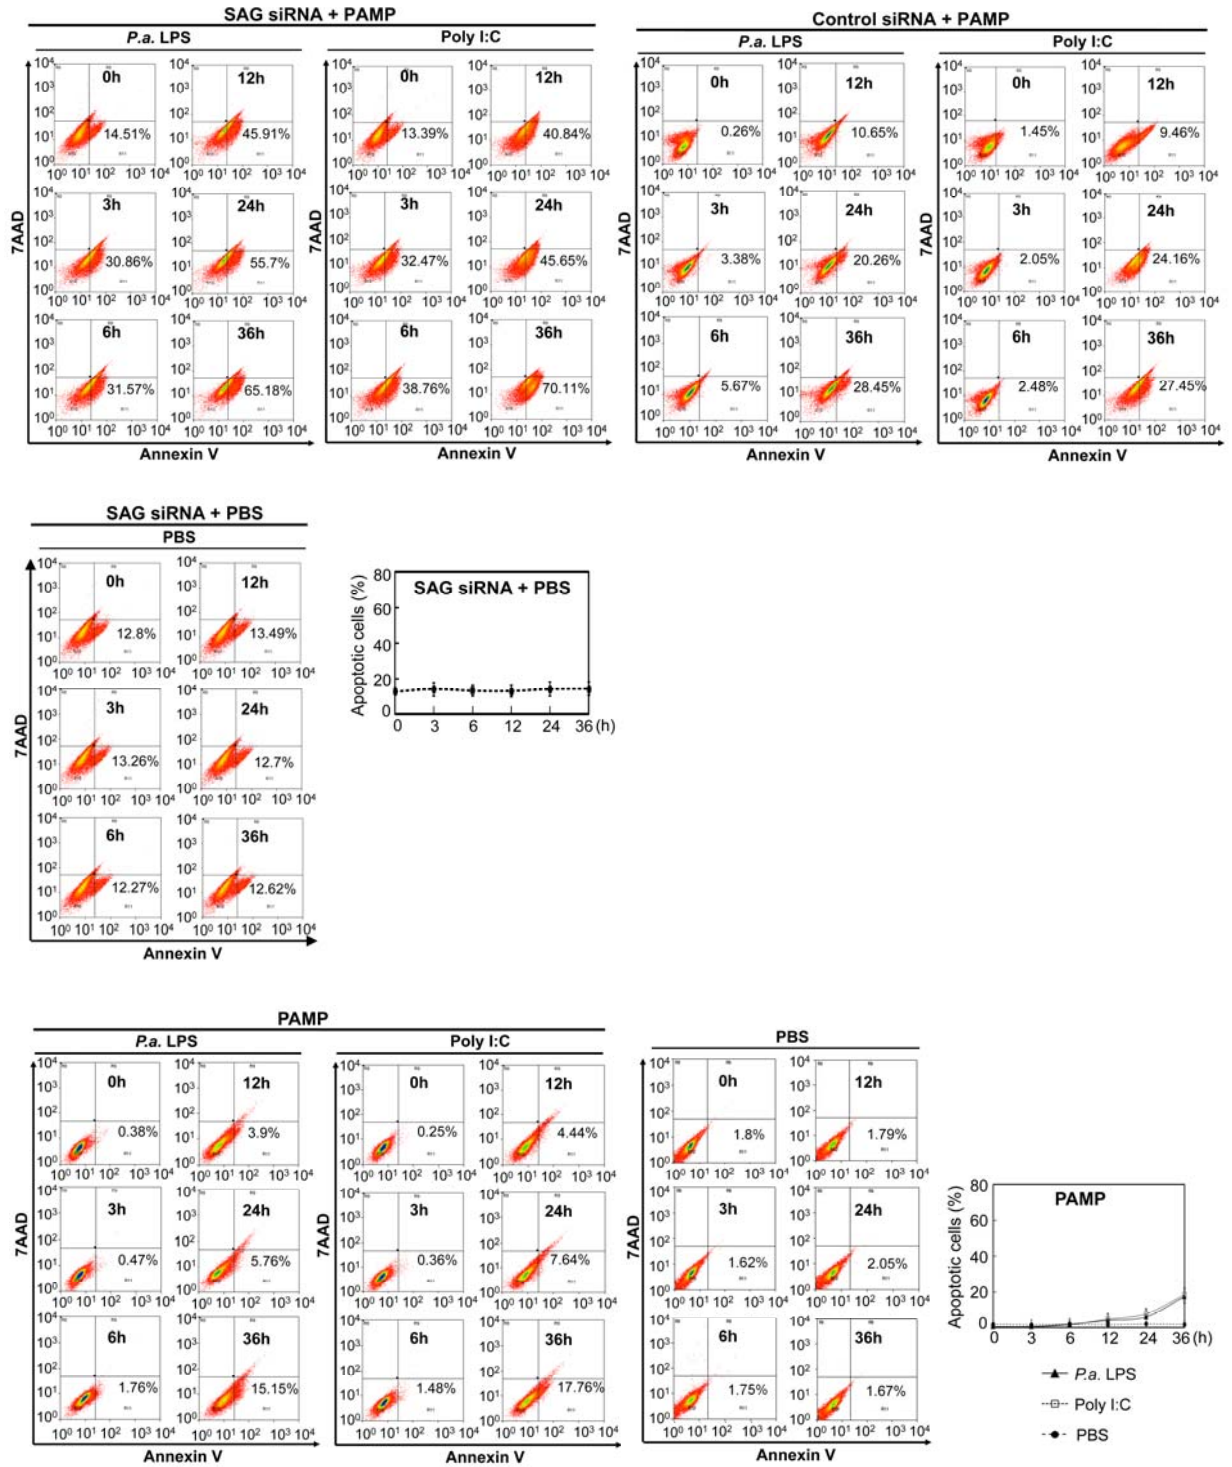

## B. FACS histograms of TMRE staining

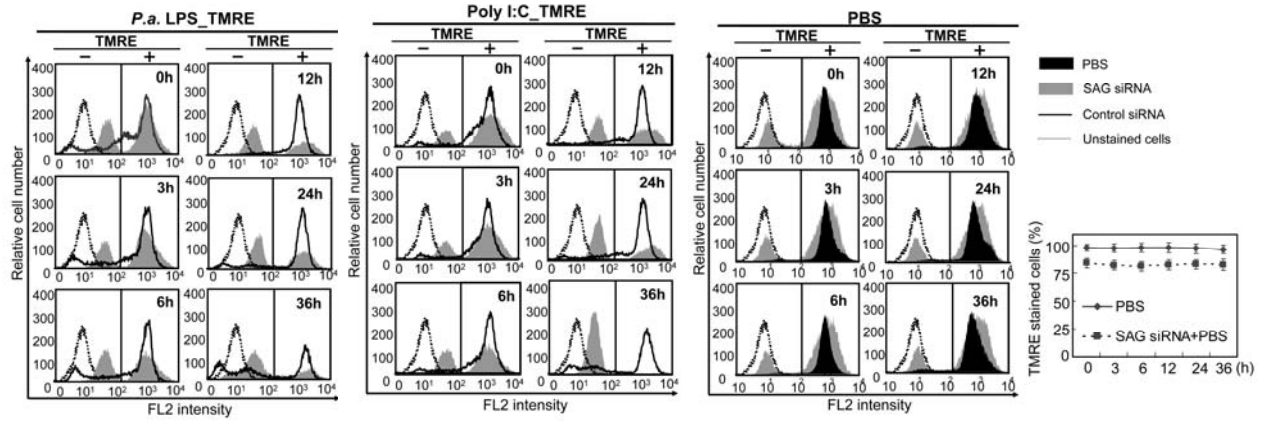

## C. FACS histograms of caspase assay

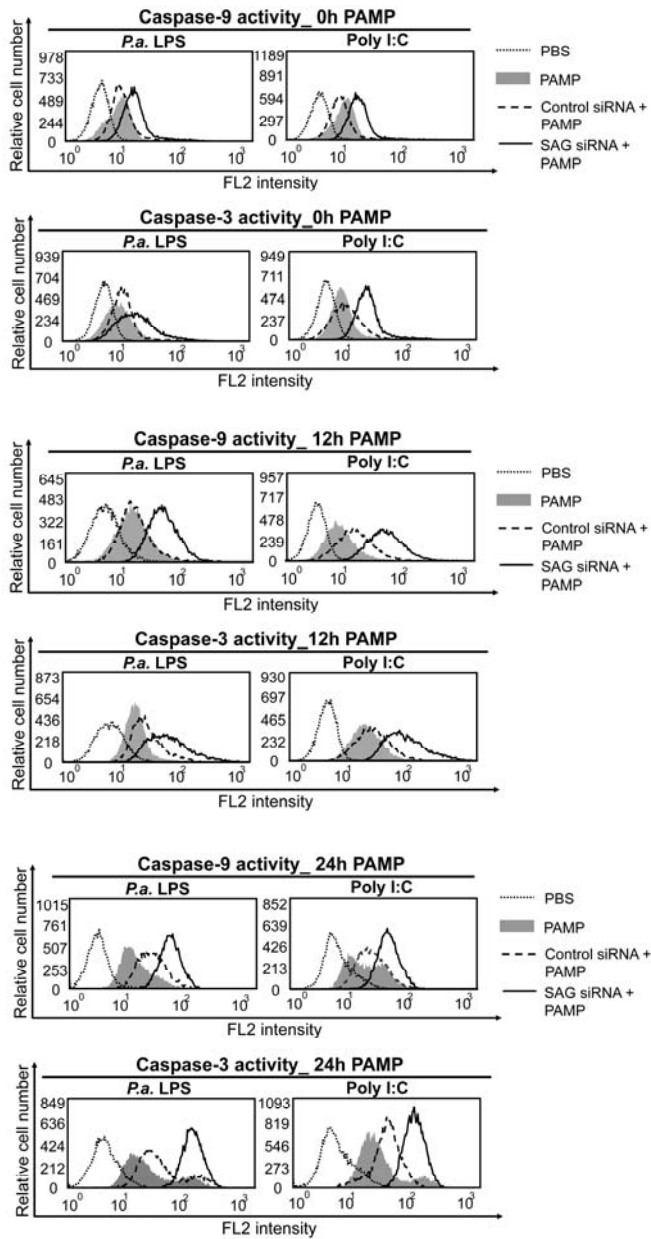

**Figure S4. Expression profile of SAG, Bcl-2, Bax, SARM, Noxa and Bcl-xL in J774 cells after PAMP treatments (with and without SAG-knockdown).**

**A. mRNA levels of Bax, SARM, SAG and Bcl-2**

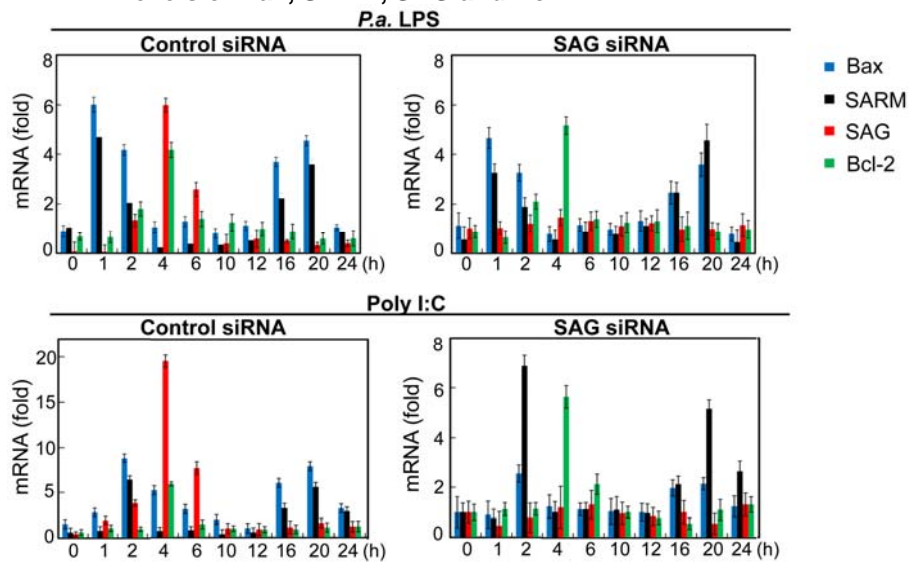

**B. mRNA levels of Noxa and Bcl-xL**

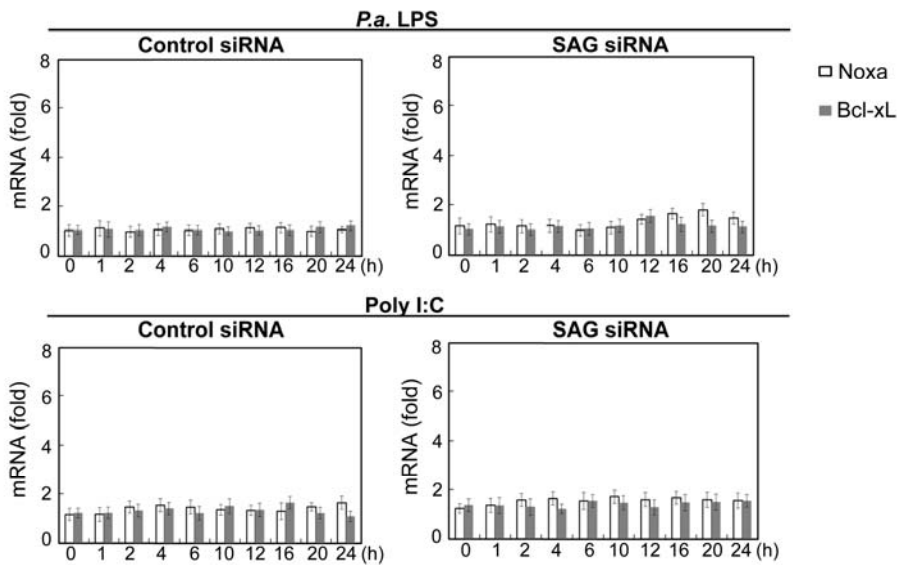

**C. Western blotting analysis of Bax, SARM, SAG, Bcl-2, Noxa and Bcl-xL**

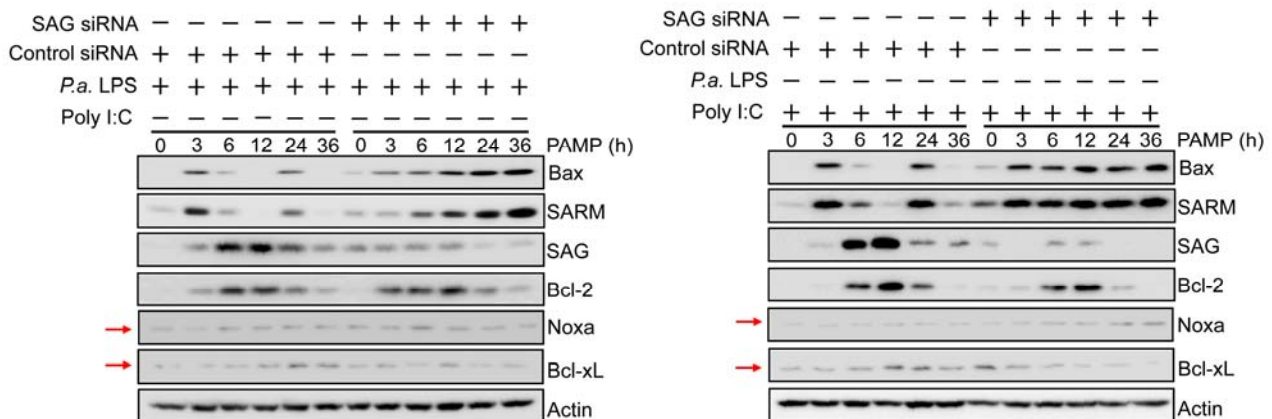

Figure S5. FACS histograms of SAG, Bcl-2, Bax and SARM in J774 cells after PAMP treatments (with and without SAG-knockdown).

**A. Representative histograms of SAG**

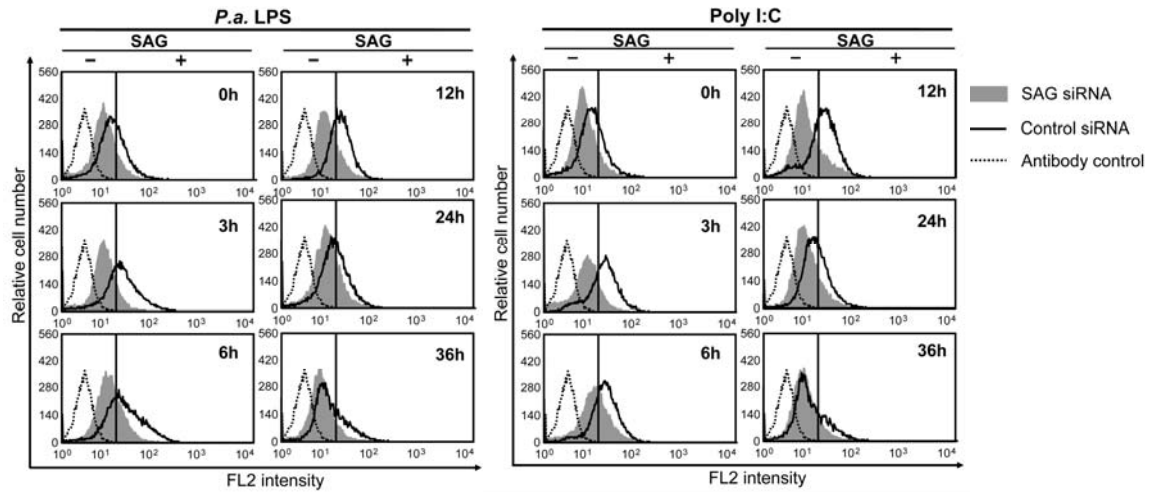

**B. Representative histograms of Bcl-2**

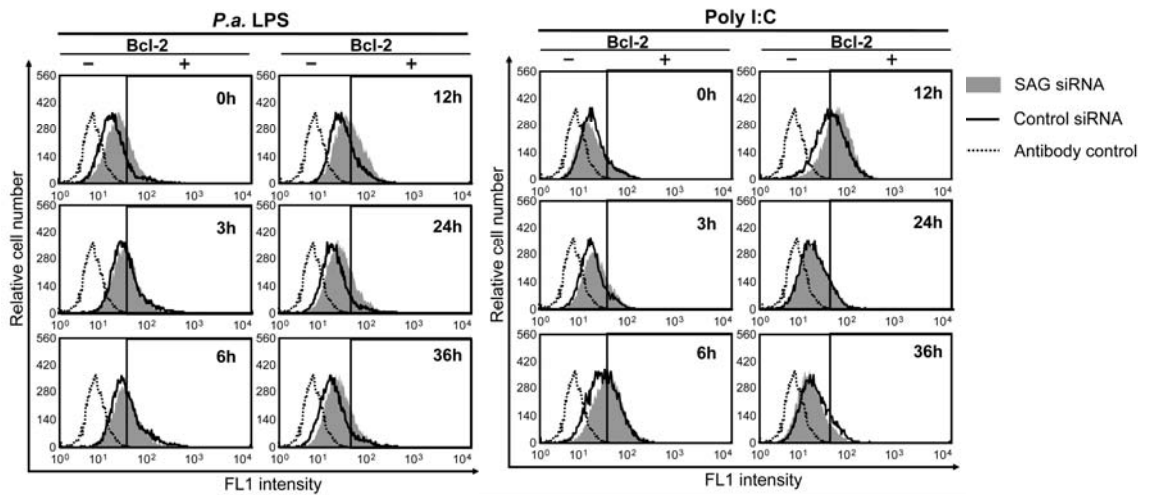

**C. Representative histograms of Bax**

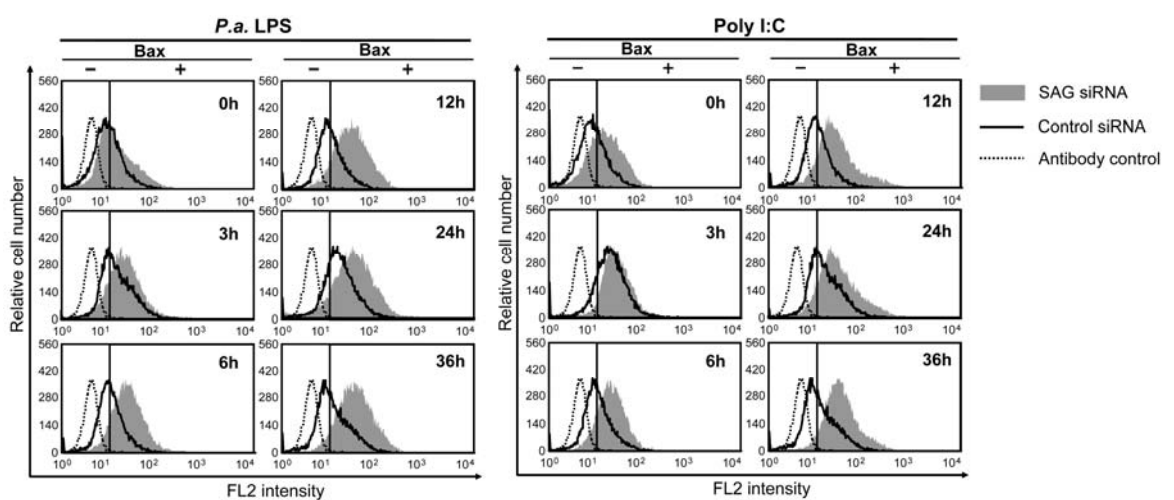

#### D. Representative histograms of SARM

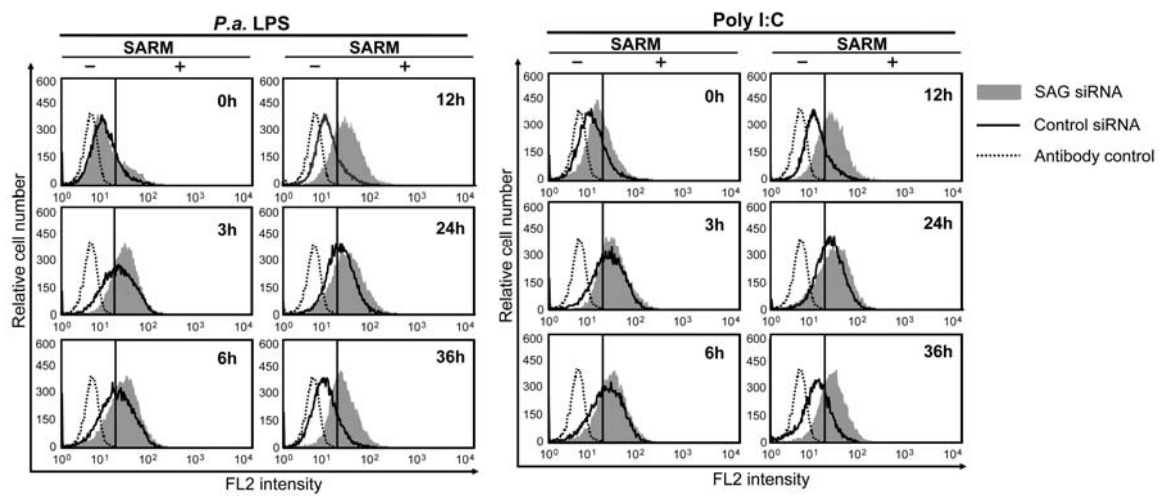

**Figure S6. SAG-knockdown did not affect the level of ubiquitinated Bcl-2 in J774, RAW and BMDM cells.**

**A. J774 cells**

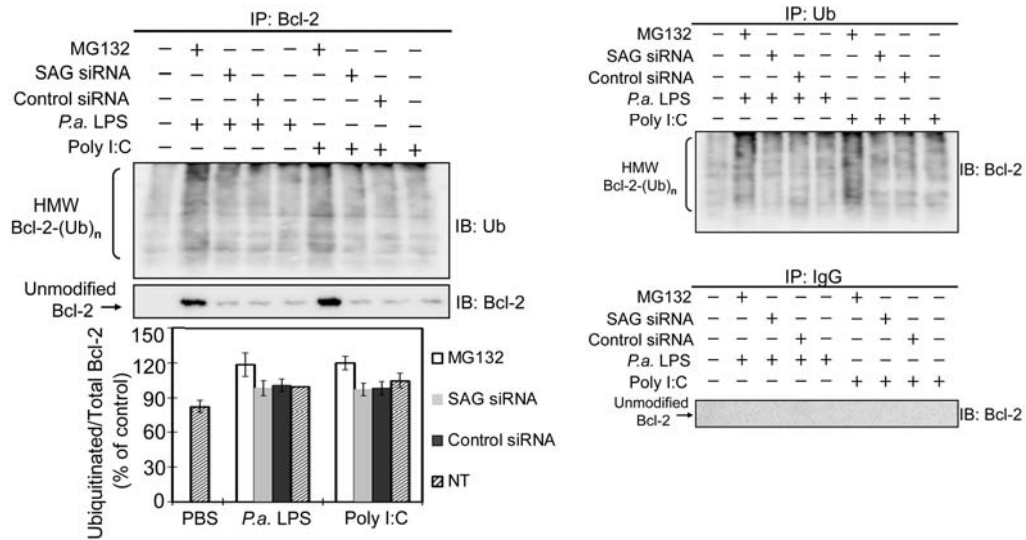

**B. BMDM cells**

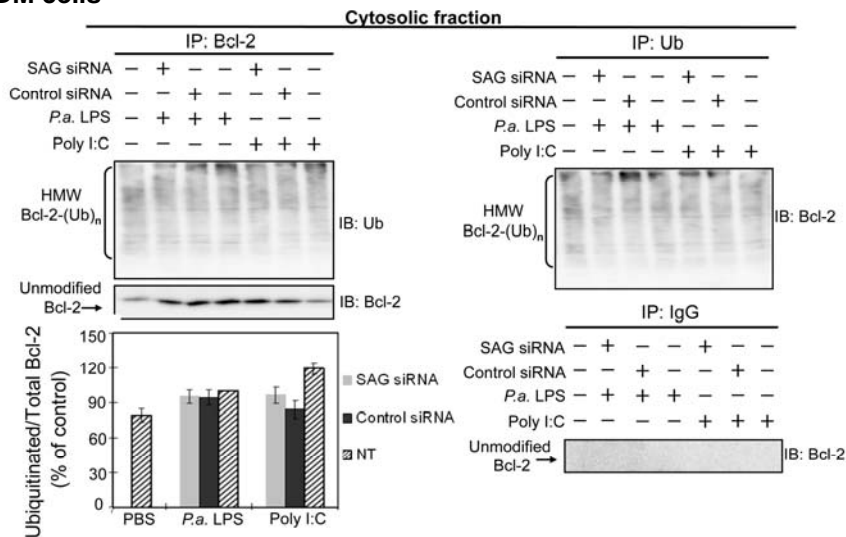

**C. RAW cells**

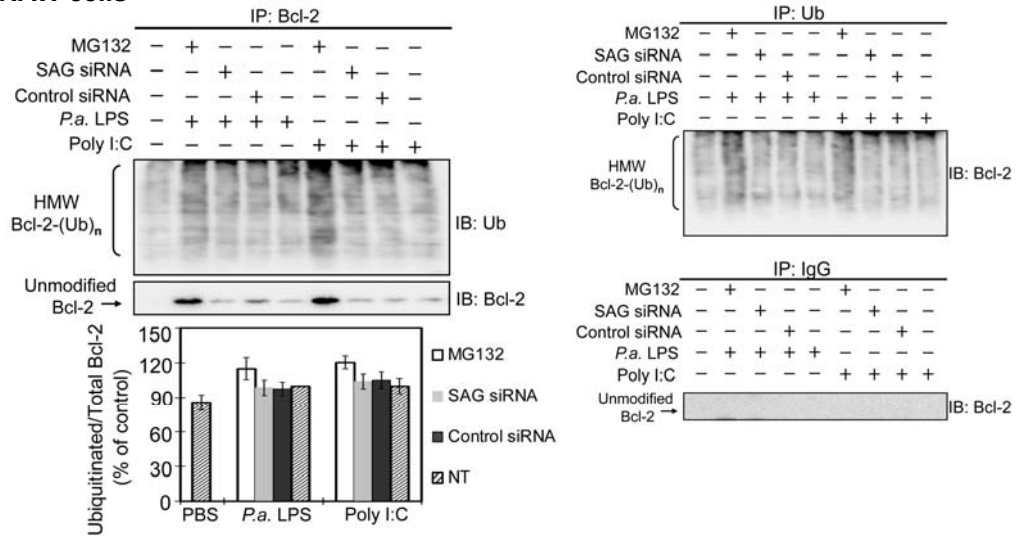



**Figure S7. A control IgG tested in J774 and BMDM cells demonstrates the specificity of immunoprecipitation.**

**A. J774 cells**

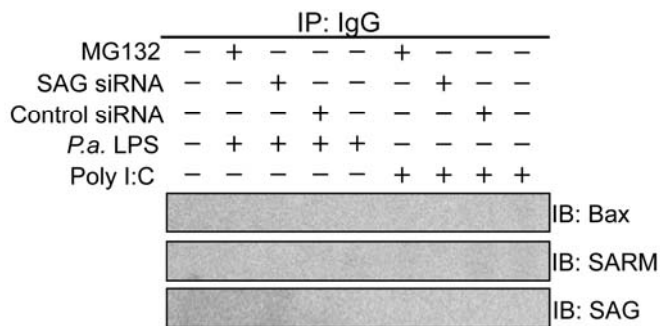

**B. BMDM cells**

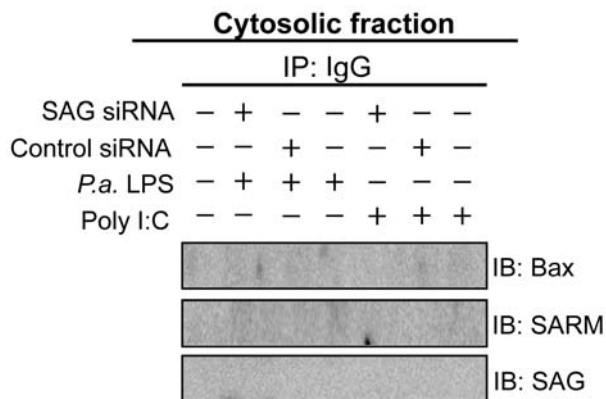

**Figure S8. RAW264.7 cells challenged with PAMPs show induction of SAG which ubiquitinates Bax and SARM.**

**A. SAG induction upon PAMP stimulation in RAW264.7 cells**

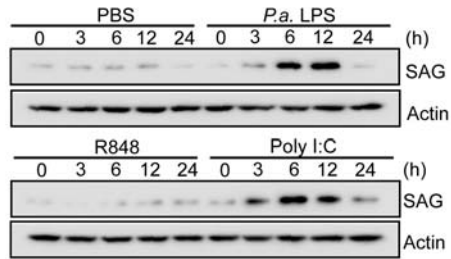

**B. Cytochrome c release in RAW264.7 cells**

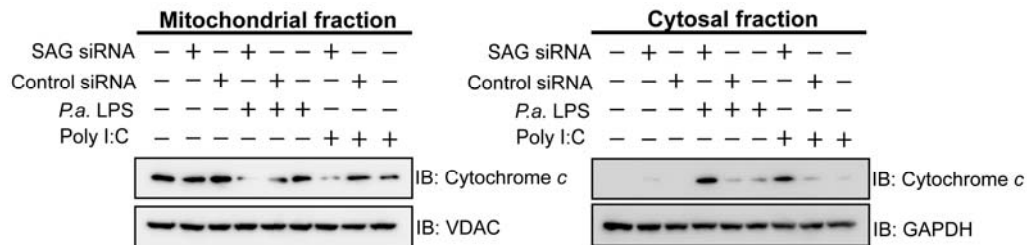

**C. Presence of apoptotic proteins in RAW264.7 cells (before IP)**

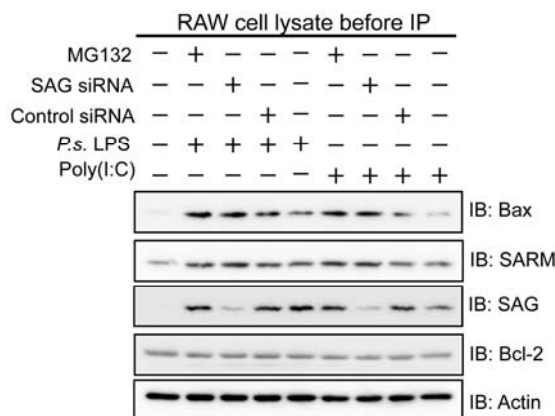

### D. Ubiquitin assay in RAW264.7 cells

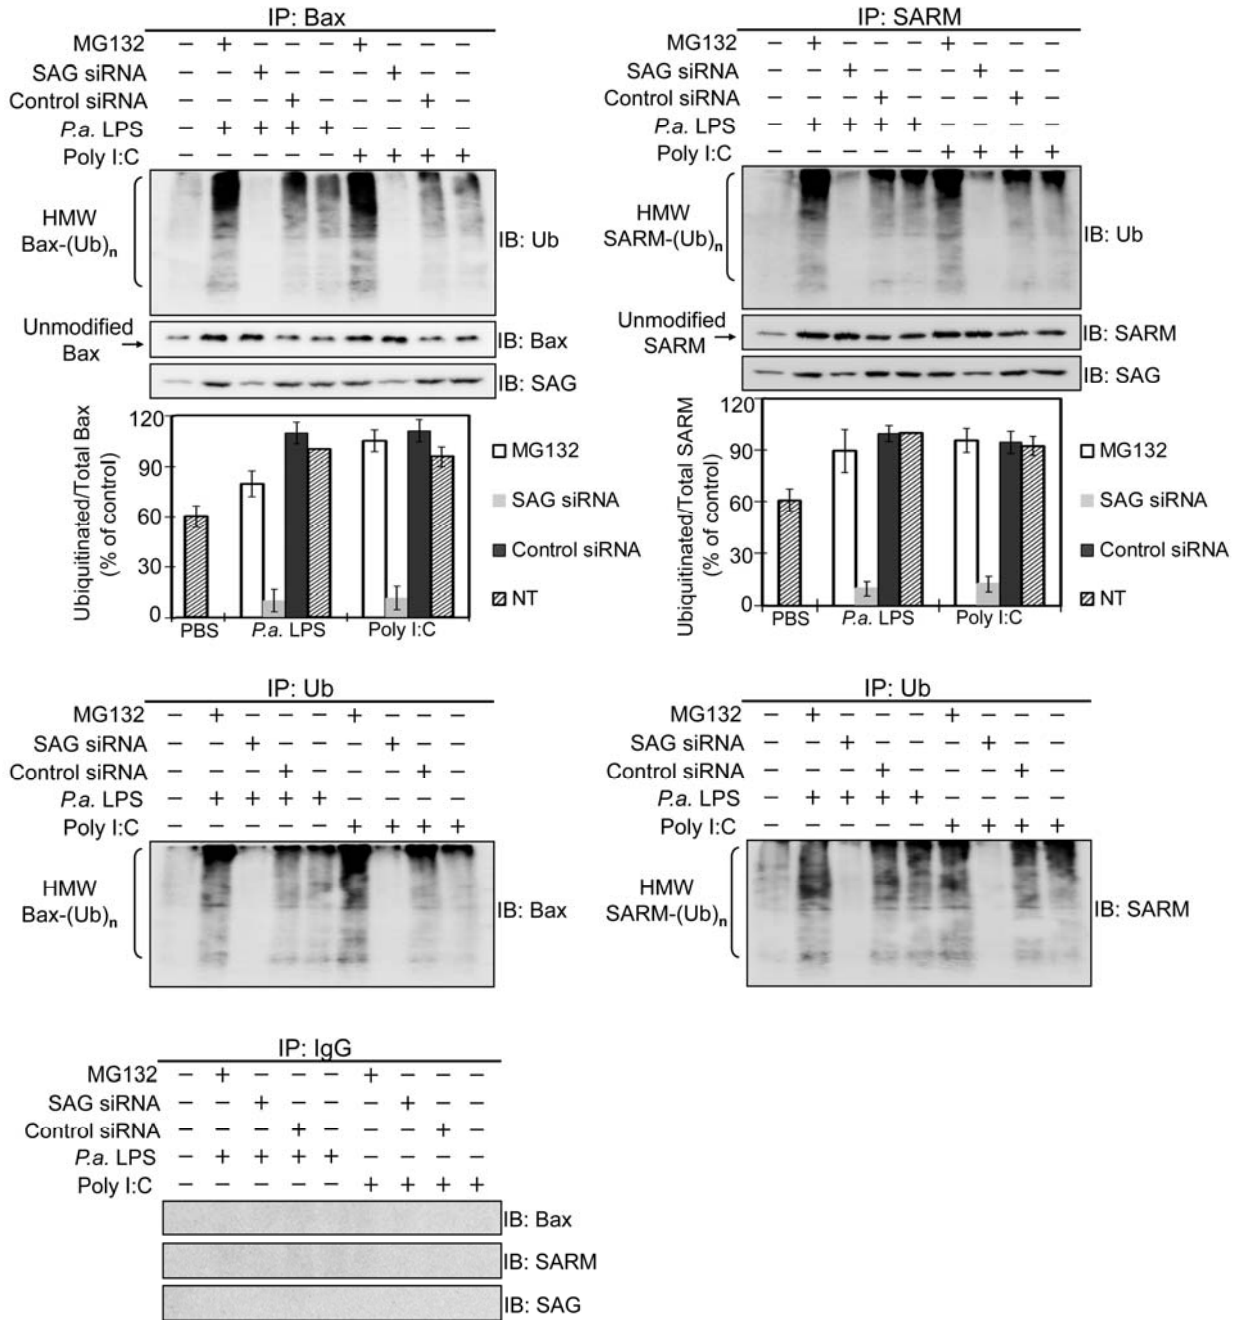

Figure S9. SAG is an evolutionarily conserved protein.

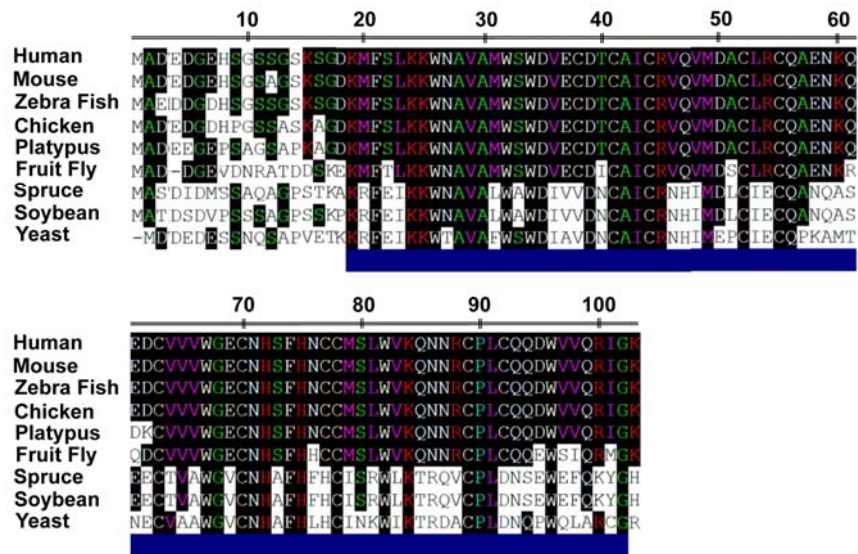

Figure S10. SAG overexpression in primary BMDM cells.

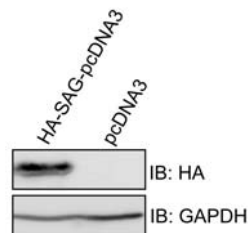

Supplement: cdd201454x1.pdf [file cdd201454x1.pdf]
